# Supplementary material for: Inter- and intraspecific conflicts between parasites over host manipulation
Source: PubMed Central journal article supplement (PMC4760176; doi:10.1098/rspb.2015.2870), 2016-02-10
Supplement: rspb20152870supp1.pdf [file rspb20152870supp1.pdf]

1 **Supplementary information**

2

3 **Table S1: Outcome of likelihood ratio tests for copepod activity (i.e., proportion of time spent moving within one minute).** The initial model used whether  
 4 or not a copepod moved within a two second interval as response and the day after the first infection (DAY), the Period in the recording (PERIOD), i.e. after  
 5 a simulated predator attack vs. after a recovery period and the interaction between DAY and TIME as fixed effects. We used the copepod identity as a  
 6 random factor and included DAY and PERIOD (AIC: Experiment I: 126326, Experiment II: 66973). Subsequently, we added the treatment (TREAT) and all its  
 7 interactions with DAY and PERIOD. Test statistics and MCMC-estimated p-values are for the comparison with the preceding model.

| Experiment I                        |        |      |        |         | Experiment II                      |       |      |         |         |
|-------------------------------------|--------|------|--------|---------|------------------------------------|-------|------|---------|---------|
| Factors                             | AIC    | DF   | Chisq  | p       | Factors                            | AIC   | DF   | Chisq   | p       |
| + TREAT                             | 126248 | 15,5 | 88.522 | <0.0001 | + TREAT                            | 66941 | 13,3 | 38.223  | <0.0001 |
| + DAY:TREAT                         | 126177 | 20,5 | 80.475 | <0.0001 | + DAY:TREAT                        | 66872 | 16,3 | 74.504  | <0.0001 |
| + PERIOD:TREAT                      | 126160 | 25,5 | 27.401 | <0.0001 | + PERIOD:TREAT                     | 66770 | 19,3 | 108.823 | <0.0001 |
| + PERIOD:DAY:TREAT                  | 126117 | 30,5 | 53.011 | <0.0001 | + PERIOD:DAY:TREAT                 | 66747 | 22,3 | 28.672  | <0.0001 |
| 100800 observations on 240 copepods |        |      |        |         | 62160 observations on 150 copepods |       |      |         |         |

8 **Table S2: Outcome of likelihood ratio tests for latency to resume moving after a simulated**  
9 **predation attack.** The initial model used the time when a copepod first moved following a 10 second  
10 interval after the simulated predator attack and the day after the first infection (DAY) as fixed effect.  
11 We used the copepod identity as a random factor and included DAY (AIC: Experiment I: 5191,  
12 Experiment II: 3309). Subsequently, we added the treatment (TREAT) and its interactions with DAY.  
13 Test statistics and MCMC-estimated p-values are for the comparison with the preceding model.

| Experiment I                      |      |      |        |         | Experiment II                     |      |      |        |         |
|-----------------------------------|------|------|--------|---------|-----------------------------------|------|------|--------|---------|
| Factors                           | AIC  | DF   | Chisq  | p       | Factors                           | AIC  | DF   | Chisq  | p       |
| + TREAT                           | 5116 | 11,5 | 84.623 | <0.0001 | + TREAT                           | 3281 | 9,3  | 33.871 | <0.0001 |
| + DAY:TREAT                       | 5066 | 16,5 | 60.699 | <0.0001 | + DAY:TREAT                       | 3229 | 12,3 | 58.168 | <0.0001 |
| 1680 observations on 240 copepods |      |      |        |         | 1036 observations on 150 copepods |      |      |        |         |

14 **Table S3: Outcome of multiple comparisons between days for each treatment.** Results from experiment I. Significant p-values are highlighted in bold.  
 15 Control: Uninfected control copepods, CAM: Copepods infected with *C. lacustris* on day 0, cam: Copepods infected with *C. lacustris* on day 7, sch: Copepods  
 16 infected with *S. solidus* on day 7, CAM-cam: Copepods infected with one *L. lacustris* on day 0 plus one on day 7, CAM-sch: Copepods infected with one *L.*  
 17 *lacustris* on day 0 plus one *S. solidus* on day 7.

| Activity after simulated predator attack |         |                  |       |                  |        |                  |       |                  |         |                  |         |                  |
|------------------------------------------|---------|------------------|-------|------------------|--------|------------------|-------|------------------|---------|------------------|---------|------------------|
| Treatment                                | Control |                  | CAM   |                  | cam    |                  | sch   |                  | CAM-cam |                  | CAM-sch |                  |
| Comparison                               | Z       | p                | Z     | p                | Z      | p                | Z     | p                | Z       | p                | Z       | p                |
| day9-day11                               | 0.34    | 1                | 24.50 | <b>&lt;0.001</b> | -11.34 | <b>&lt;0.001</b> | -9.63 | <b>&lt;0.001</b> | 20.05   | <b>&lt;0.001</b> | 21.03   | <b>&lt;0.001</b> |
| day11-day13                              | -2.98   | <b>0.045</b>     | 3.94  | <b>0.002</b>     | -5.43  | <b>&lt;0.001</b> | -9.35 | <b>&lt;0.001</b> | 2.61    | 0.122            | 2.91    | 0.055            |
| day13-day15                              | 3.29    | <b>0.018</b>     | -2.76 | 0.080            | -2.85  | 0.064            | 1.88  | 0.497            | -3.48   | <b>0.009</b>     | -1.77   | 0.569            |
| day15-day17                              | -1.97   | 0.434            | -2.61 | 0.118            | 17.80  | <b>&lt;0.001</b> | 7.89  | <b>&lt;0.001</b> | -2.50   | 0.155            | -6.70   | <b>&lt;0.001</b> |
| day17-day19                              | 2.14    | 0.327            | -0.82 | 0.982            | 10.35  | <b>&lt;0.001</b> | -3.38 | <b>0.013</b>     | 2.92    | 0.053            | -3.81   | <b>0.003</b>     |
| day19-day21                              | -3.16   | <b>0.026</b>     | -0.77 | 0.987            | -0.96  | 0.961            | 5.55  | <b>&lt;0.001</b> | 2.05    | 0.378            | -1.54   | 0.721            |
| Observations                             | 8400    |                  | 8400  |                  | 8400   |                  | 8400  |                  | 8400    |                  | 8400    |                  |
| Copepods                                 | 40      |                  | 40    |                  | 40     |                  | 40    |                  | 40      |                  | 40      |                  |
| Activity after a recovery period         |         |                  |       |                  |        |                  |       |                  |         |                  |         |                  |
| Treatment                                | Control |                  | CAM   |                  | cam    |                  | sch   |                  | CAM-cam |                  | CAM-sch |                  |
| Comparison                               | Z       | p                | Z     | p                | Z      | p                | Z     | p                | Z       | p                | Z       | p                |
| day9-day11                               | -0.64   | 0.996            | 21.26 | <b>&lt;0.001</b> | -4.67  | <b>&lt;0.001</b> | -7.06 | <b>&lt;0.001</b> | 18.22   | <b>&lt;0.001</b> | 21.34   | <b>&lt;0.001</b> |
| day11-day13                              | -2.61   | 0.122            | 3.24  | <b>0.019</b>     | -6.04  | <b>&lt;0.001</b> | -4.95 | <b>&lt;0.001</b> | -1.12   | 0.920            | 0.04    | 1                |
| day13-day15                              | 4.39    | <b>&lt;0.001</b> | -1.75 | 0.568            | -2.08  | 0.350            | 0.76  | 0.989            | -0.75   | 0.989            | 0.38    | 1                |
| day15-day17                              | 0.68    | 0.994            | 1.58  | 0.683            | 15.69  | <b>&lt;0.001</b> | 5.02  | <b>&lt;0.001</b> | -2.05   | 0.378            | -3.81   | <b>0.003</b>     |
| day17-day19                              | 0.34    | 1                | -3.83 | <b>0.002</b>     | 7.20   | <b>&lt;0.001</b> | 2.16  | 0.317            | 2.89    | 0.059            | -3.51   | <b>0.008</b>     |
| day19-day21                              | -2.30   | 0.246            | -1.11 | 0.922            | 2.99   | <b>0.042</b>     | 3.98  | <b>0.001</b>     | -0.96   | 0.962            | 1.11    | 0.924            |
| Observations                             | 8400    |                  | 8400  |                  | 8400   |                  | 8400  |                  | 8400    |                  | 8400    |                  |
| Copepods                                 | 40      |                  | 40    |                  | 40     |                  | 40    |                  | 40      |                  | 40      |                  |

| <b>Latency to resume moving after a simulated predator attack</b> |         |       |        |                  |       |                  |       |       |         |                  |         |                  |
|-------------------------------------------------------------------|---------|-------|--------|------------------|-------|------------------|-------|-------|---------|------------------|---------|------------------|
| Treatment                                                         | Control |       | CAM    |                  | cam   |                  | sch   |       | CAM-cam |                  | CAM-sch |                  |
| Comparison                                                        | Z       | p     | Z      | p                | Z     | p                | Z     | p     | Z       | p                | Z       | p                |
| day9-day11                                                        | -0.28   | 1     | -12.68 | <b>&lt;0.001</b> | 2.08  | 0.366            | 1.72  | 0.604 | -8.07   | <b>&lt;0.001</b> | -10.32  | <b>&lt;0.001</b> |
| day11-day13                                                       | 0.18    | 1     | -1.83  | 0.526            | 1.21  | 0.891            | 2.26  | 0.261 | 0.30    | 1                | -0.48   | 0.999            |
| day13-day15                                                       | -0.81   | 0.984 | 0.71   | 0.992            | 0.74  | 0.990            | -2.20 | 0.293 | 0.78    | 0.987            | -0.42   | 1                |
| day15-day17                                                       | 0.01    | 1     | -0.92  | 0.969            | -6.41 | <b>&lt;0.001</b> | -0.18 | 1     | -0.10   | 1                | 1.52    | 0.731            |
| day17-day19                                                       | -0.02   | 1     | 0.73   | 0.991            | -2.04 | 0.388            | -1.85 | 0.516 | -1.02   | 0.949            | -0.24   | 1                |
| day19-day21                                                       | 0.26    | 1     | 0.67   | 0.994            | -0.02 | 1                | 0.20  | 1     | 0.62    | 0.996            | 0.39    | 1                |
| Observations                                                      | 280     |       | 280    |                  | 280   |                  | 280   |       | 280     |                  | 280     |                  |
| Copepods                                                          | 40      |       | 40     |                  | 40    |                  | 40    |       | 40      |                  | 40      |                  |

19 **Table S4: Outcome of multiple comparisons between days for each treatment.** Results from  
 20 experiment II. Significant p-values are highlighted in bold. Control: Uninfected control copepods,  
 21 SCH: Copepods infected with *S. solidus* on day 0, cam: Copepods infected with *C. lacustris* on day 7,  
 22 SCH-cam: Copepods infected with one *S. solidus* on day 0 plus one *C. lacustris* on day 7.

| Activity after simulated predator attack                   |         |              |       |                  |       |                  |         |                  |  |
|------------------------------------------------------------|---------|--------------|-------|------------------|-------|------------------|---------|------------------|--|
| Treatment                                                  | Control |              | SCH   |                  | cam   |                  | SCH-cam |                  |  |
| Comparison                                                 | Z       | p            | Z     | p                | Z     | p                | Z       | p                |  |
| day9-day11                                                 | 3.78    | <b>0.003</b> | 2.24  | 0.274            | -4.17 | <b>0.001</b>     | 0.98    | 0.957            |  |
| day11-day13                                                | -1.78   | 0.560        | 5.47  | <b>&lt;0.001</b> | -4.79 | <b>&lt;0.001</b> | 1.58    | 0.687            |  |
| day13-day15                                                | 1.68    | 0.629        | 0.89  | 0.974            | 0.80  | 0.984            | 4.55    | <b>&lt;0.001</b> |  |
| day15-day17                                                | 1.79    | 0.554        | -1.49 | 0.751            | 18.48 | <b>&lt;0.001</b> | 8.62    | <b>&lt;0.001</b> |  |
| day17-day19                                                | -2.09   | 0.358        | 1.98  | 0.429            | 6.42  | <b>&lt;0.001</b> | 5.33    | <b>&lt;0.001</b> |  |
| day19-day21                                                | -0.13   | 1            | -2.72 | 0.094            | -3.33 | <b>0.014</b>     | -1.17   | 0.903            |  |
| Observations                                               | 8340    |              | 6240  |                  | 8250  |                  | 8250    |                  |  |
| Copepods                                                   | 40      |              | 30    |                  | 40    |                  | 40      |                  |  |
| Activity after a recovery period                           |         |              |       |                  |       |                  |         |                  |  |
| Treatment                                                  | Control |              | SCH   |                  | cam   |                  | SCH-cam |                  |  |
| Comparison                                                 | Z       | p            | Z     | p                | Z     | p                | Z       | p                |  |
| day9-day11                                                 | 1.97    | 0.434        | 1.54  | 0.721            | -7.86 | <b>&lt;0.001</b> | -0.29   | 1                |  |
| day11-day13                                                | 2.20    | 0.294        | 0.68  | 0.994            | -1.67 | 0.617            | 0.22    | 1                |  |
| day13-day15                                                | -0.48   | 0.999        | 0.16  | 1                | -2.81 | 0.068            | -3.20   | <b>0.022</b>     |  |
| day15-day17                                                | 0.65    | 0.995        | 3.39  | <b>0.012</b>     | 18.73 | <b>&lt;0.001</b> | 14.67   | <b>&lt;0.001</b> |  |
| day17-day19                                                | -2.58   | 0.131        | 1.53  | 0.728            | 8.13  | <b>&lt;0.001</b> | 8.17    | <b>&lt;0.001</b> |  |
| day19-day21                                                | -1.38   | 0.811        | 1.94  | 0.455            | -3.17 | <b>0.023</b>     | -0.61   | 0.996            |  |
| Observations                                               | 8340    |              | 6240  |                  | 8250  |                  | 8250    |                  |  |
| Copepods                                                   | 40      |              | 30    |                  | 40    |                  | 40      |                  |  |
| Latency to resume moving after a simulated predator attack |         |              |       |                  |       |                  |         |                  |  |
| Treatment                                                  | Control |              | SCH   |                  | cam   |                  | SCH-cam |                  |  |
| Comparison                                                 | Z       | p            | Z     | p                | Z     | p                | Z       | p                |  |
| day9-day11                                                 | -2.54   | 0.145        | -1.24 | 0.880            | 1.36  | 0.823            | -0.33   | 1                |  |
| day11-day13                                                | 2.18    | 0.304        | -0.46 | 0.999            | 3.17  | <b>0.025</b>     | -1.68   | 0.631            |  |
| day13-day15                                                | -0.47   | 0.999        | -0.86 | 0.978            | 0.27  | 1                | -0.68   | 0.994            |  |
| day15-day17                                                | -0.62   | 0.996        | 0.54  | 0.998            | -9.15 | <b>&lt;0.001</b> | -4.16   | <b>0.001</b>     |  |
| day17-day19                                                | 0.07    | 1            | -1.11 | 0.926            | -2.02 | 0.404            | -0.27   | 1                |  |
| day19-day21                                                | -0.82   | 0.983        | 0.65  | 0.995            | 1.16  | 0.909            | 0.04    | 1                |  |
| Observations                                               | 278     |              | 275   |                  | 208   |                  | 275     |                  |  |
| Copepods                                                   | 40      |              | 40    |                  | 30    |                  | 40      |                  |  |

23 **Table S5: Outcome of multiple comparisons between treatments for each day.** Results from experiment I. Significant p-values are highlighted in bold.  
 24 Control: Uninfected control copepods. CAM: Copepods infected with *C. lacustris* on day 0. cam: Copepods infected with *C. lacustris* on day 7. sch: Copepods  
 25 infected with *S. solidus* on day 7. CAM-cam: Copepods infected with one *L. lacustris* on day 0 plus one on day 7. CAM-sch: Copepods infected with one *L.*  
 26 *lacustris* on day 0 plus one *S. solidus* on day 7.

| Activity after simulated predator attack |       |              |       |              |       |              |        |              |       |              |       |       |       |       |
|------------------------------------------|-------|--------------|-------|--------------|-------|--------------|--------|--------------|-------|--------------|-------|-------|-------|-------|
| Day                                      | 9     |              | 11    |              | 13    |              | 15     |              | 17    |              | 19    |       | 21    |       |
|                                          | Z     | p            | Z     | p            | Z     | p            | Z      | p            | Z     | p            | Z     | p     | Z     | p     |
| Control_CAM                              | -9.41 | <0.001       | 0.79  | 0.969        | 3.03  | <b>0.030</b> | 0.73   | 0.978        | 1.22  | 0.828        | -0.35 | 0.999 | 0.10  | 1     |
| Control_cam                              | -4.30 | <0.001       | -6.71 | <0.001       | -8.64 | <0.001       | -11.40 | <0.001       | -3.64 | <b>0.004</b> | -0.65 | 0.987 | 1.38  | 0.738 |
| Control_sch                              | 0.34  | 0.999        | -1.84 | 0.442        | -3.16 | <b>0.019</b> | -4.50  | <0.001       | -2.66 | 0.084        | -2.06 | 0.307 | 0.28  | 1     |
| Control_CAM-cam                          | -6.52 | <0.001       | 0.69  | 0.983        | 1.19  | 0.844        | -0.69  | 0.983        | -1.56 | 0.623        | -0.64 | 0.988 | -0.18 | 1     |
| Control_CAM-sch                          | -7.95 | <0.001       | 1.23  | 0.820        | 2.21  | 0.234        | 0.91   | 0.944        | -0.73 | 0.978        | -2.35 | 0.174 | -0.89 | 0.949 |
| CAM_cam                                  | -5.60 | <0.001       | 7.44  | <0.001       | 11.37 | <0.001       | 12.02  | <0.001       | 4.85  | <0.001       | 0.30  | 1     | -1.28 | 0.795 |
| CAM_sch                                  | 9.70  | <0.001       | -2.62 | 0.093        | -6.14 | <0.001       | -5.22  | <0.001       | -3.87 | <b>0.002</b> | -1.71 | 0.525 | 0.18  | 1     |
| CAM_CAM-cam                              | 3.43  | <b>0.008</b> | -0.10 | 1            | -1.84 | 0.437        | -1.42  | 0.716        | -2.79 | 0.060        | -0.29 | 1     | -0.28 | 1     |
| CAM_CAM-sch                              | 1.79  | 0.469        | 0.44  | 0.998        | -0.83 | 0.962        | 0.18   | 1            | -1.95 | 0.370        | -2.00 | 0.344 | -0.99 | 0.921 |
| cam_sch                                  | 4.64  | <0.001       | 4.95  | <0.001       | 5.67  | <0.001       | 7.43   | <0.001       | 1.00  | 0.918        | -1.42 | 0.717 | -1.10 | 0.883 |
| cam_CAM_cam                              | -2.32 | 0.186        | 7.35  | <0.001       | 9.72  | <0.001       | 10.80  | <0.001       | 2.11  | 0.283        | 0.01  | 1     | -1.56 | 0.627 |
| cam_CAM-sch                              | -3.93 | <b>0.001</b> | 7.87  | <0.001       | 10.65 | <0.001       | 12.19  | <0.001       | 2.94  | <b>0.039</b> | -1.70 | 0.530 | -2.27 | 0.207 |
| sch_CAM-cam                              | 6.85  | <0.001       | -2.52 | 0.118        | -4.33 | <0.001       | -3.81  | <b>0.002</b> | -1.11 | 0.878        | -1.42 | 0.713 | 0.45  | 0.998 |
| sch_CAM_sch                              | 8.27  | <0.001       | -3.06 | <b>0.027</b> | -5.34 | <0.001       | -5.40  | <0.001       | -1.94 | 0.376        | 0.29  | 1     | 1.16  | 0.855 |
| CAM-cam_CAM_sch                          | -1.67 | 0.551        | 0.54  | 0.995        | 1.02  | 0.911        | 1.60   | 0.598        | 0.84  | 0.961        | -1.71 | 0.526 | -0.71 | 0.981 |
| Observations                             | 7200  |              | 7200  |              | 7200  |              | 7200   |              | 7200  |              | 7200  |       | 7200  |       |
| Copepods                                 | 240   |              | 240   |              | 240   |              | 240    |              | 240   |              | 240   |       | 240   |       |

27

| Activity after a recovery period |        |                  |       |                  |       |                  |          |                  |       |              |       |                  |       |              |
|----------------------------------|--------|------------------|-------|------------------|-------|------------------|----------|------------------|-------|--------------|-------|------------------|-------|--------------|
| Day                              | 9      |                  | 11    |                  | 13    |                  | 15       |                  | 17    |              | 19    |                  | 21    |              |
| Control_CAM                      | -10.57 | <b>&lt;0.001</b> | 0.22  | 1                | 2.98  | <b>0.034</b>     | 1.03     | 0.875            | 0.49  | 0.997        | -0.60 | 0.991            | 0.31  | 1            |
| Control_cam                      | -3.17  | <b>0.019</b>     | -8.26 | <b>&lt;0.001</b> | -9.88 | <b>&lt;0.001</b> | -6544.67 | <b>&lt;0.001</b> | -3.04 | <b>0.029</b> | 0.09  | 1                | 0.93  | 0.939        |
| Control_sch                      | 0.79   | 0.969            | -2.69 | 0.076            | -5.31 | <b>&lt;0.001</b> | -7.72    | <b>&lt;0.001</b> | -1.98 | 0.354        | -4.41 | <b>&lt;0.001</b> | -0.94 | 0.936        |
| Control_CAM-cam                  | -8.63  | <b>&lt;0.001</b> | -0.78 | 0.971            | 1.00  | 0.918            | -1.82    | 0.380            | -1.36 | 0.751        | -1.21 | 0.830            | 0.57  | 0.993        |
| Control_CAM-sch                  | -8.80  | <b>&lt;0.001</b> | -0.47 | 0.997            | 1.73  | 0.511            | -0.01    | 1                | -1.68 | 0.544        | -4.23 | <b>&lt;0.001</b> | -3.13 | <b>0.022</b> |
| CAM_cam                          | -7.79  | <b>&lt;0.001</b> | 8.44  | <b>&lt;0.001</b> | 12.46 | <b>&lt;0.001</b> | 18.86    | <b>&lt;0.001</b> | 3.51  | <b>0.006</b> | -0.69 | 0.983            | -0.61 | 0.990        |
| CAM_sch                          | 11.24  | <b>&lt;0.001</b> | -2.90 | <b>0.043</b>     | -8.18 | <b>&lt;0.001</b> | -6.26    | <b>&lt;0.001</b> | -2.46 | 0.135        | -3.82 | <b>0.002</b>     | -1.25 | 0.813        |
| CAM_CAM-cam                      | 2.40   | 0.156            | -1.00 | 0.920            | -1.98 | 0.352            | -2.02    | 0.269            | -1.85 | 0.435        | -0.62 | 0.990            | 0.26  | 1            |
| CAM_CAM-sch                      | 2.07   | 0.302            | -0.69 | 0.983            | -1.26 | 0.808            | -0.74    | 0.967            | -2.17 | 0.254        | -3.64 | <b>0.004</b>     | -3.43 | <b>0.008</b> |
| cam_sch                          | 3.95   | <b>0.001</b>     | 5.70  | <b>&lt;0.001</b> | 4.93  | <b>&lt;0.001</b> | 9.52     | <b>&lt;0.001</b> | 1.07  | 0.894        | -4.50 | <b>&lt;0.001</b> | -1.86 | 0.427        |
| cam_CAM_cam                      | -5.65  | <b>&lt;0.001</b> | 7.50  | <b>&lt;0.001</b> | 10.76 | <b>&lt;0.001</b> | 15.95    | <b>&lt;0.001</b> | 1.69  | 0.538        | -1.30 | 0.783            | -0.35 | 0.999        |
| cam_CAM-sch                      | -5.89  | <b>&lt;0.001</b> | 7.82  | <b>&lt;0.001</b> | 11.39 | <b>&lt;0.001</b> | 17.86    | <b>&lt;0.001</b> | 1.37  | 0.745        | -4.31 | <b>&lt;0.001</b> | -4.04 | <b>0.001</b> |
| sch_CAM-cam                      | 9.35   | <b>&lt;0.001</b> | -1.91 | 0.396            | -6.28 | <b>&lt;0.001</b> | -4.27    | <b>&lt;0.001</b> | -0.62 | 0.989        | -3.21 | <b>0.017</b>     | -1.51 | 0.659        |
| sch_CAM_sch                      | 9.50   | <b>&lt;0.001</b> | -2.23 | 0.225            | -6.98 | <b>&lt;0.001</b> | -5.54    | <b>&lt;0.001</b> | -0.30 | 1            | -0.19 | 1                | 2.18  | 0.248        |
| CAM-cam_CAM_sch                  | -0.32  | 1                | 0.31  | 1                | 0.73  | 0.978            | 1.28     | 0.739            | -0.32 | 1            | -3.02 | <b>0.030</b>     | -3.69 | <b>0.003</b> |
| Observations                     | 7200   |                  | 7200  |                  | 7200  |                  | 7200     |                  | 7200  |              | 7200  |                  | 7200  |              |
| Copepods                         | 240    |                  | 240   |                  | 240   |                  | 240      |                  | 240   |              | 240   |                  | 240   |              |

| Latency to resume moving after a simulated predator attack |       |              |       |        |        |              |        |              |       |              |       |       |       |       |
|------------------------------------------------------------|-------|--------------|-------|--------|--------|--------------|--------|--------------|-------|--------------|-------|-------|-------|-------|
| Day                                                        | 9     |              | 11    |        | 13     |              | 15     |              | 17    |              | 19    |       | 21    |       |
| Control_CAM                                                | 8.05  | <0.001       | -0.25 | 1      | -2.13  | 0.270        | -0.82  | 0.964        | -1.76 | 0.491        | -1.38 | 0.740 | -0.72 | 0.980 |
| Control_cam                                                | 2.91  | <b>0.042</b> | 6.59  | <0.001 | 8.53   | <0.001       | 9.85   | <0.001       | 1.78  | 0.477        | -1.23 | 0.823 | -1.38 | 0.739 |
| Control_sch                                                | -0.09 | 1            | 1.74  | 0.502  | 4.10   | <b>0.001</b> | 2.36   | 0.170        | 2.28  | 0.203        | 0.43  | 0.998 | 0.40  | 0.999 |
| Control_CAM-cam                                            | 4.41  | <0.001       | -1.04 | 0.906  | -0.97  | 0.928        | 0.38   | 0.999        | 0.30  | 1            | -0.90 | 0.948 | -0.34 | 0.999 |
| Control_CAM-sch                                            | 6.13  | <0.001       | -0.80 | 0.967  | -1.46  | 0.690        | -1.20  | 0.835        | 0.21  | 1            | -0.02 | 1     | 0.19  | 1     |
| CAM_cam                                                    | 5.14  | <0.001       | -6.84 | <0.001 | -10.66 | <0.001       | -10.67 | <0.001       | -3.54 | <b>0.005</b> | -0.15 | 1     | 0.66  | 0.986 |
| CAM_sch                                                    | -8.14 | <0.001       | 1.99  | 0.348  | 6.23   | <0.001       | 3.18   | <b>0.018</b> | 4.04  | <b>0.001</b> | 1.81  | 0.462 | 1.12  | 0.874 |
| CAM_CAM-cam                                                | -3.64 | <b>0.004</b> | -0.79 | 0.969  | 1.16   | 0.854        | 1.20   | 0.836        | 2.06  | 0.309        | 0.48  | 0.997 | 0.38  | 0.999 |
| CAM_CAM-sch                                                | -1.92 | 0.391        | -0.56 | 0.994  | 0.67   | 0.985        | -0.38  | 0.999        | 1.97  | 0.358        | 1.36  | 0.750 | 0.91  | 0.945 |
| cam_sch                                                    | -3.00 | <b>0.032</b> | -4.85 | <0.001 | -4.43  | <0.001       | -7.49  | <0.001       | 0.50  | 0.996        | 1.66  | 0.561 | 1.78  | 0.477 |
| cam_CAM_cam                                                | 1.50  | 0.666        | -7.63 | <0.001 | -9.50  | <0.001       | -9.47  | <0.001       | -1.48 | 0.674        | 0.33  | 0.999 | 1.04  | 0.903 |
| cam_CAM-sch                                                | 3.22  | <b>0.016</b> | -7.40 | <0.001 | -9.99  | <0.001       | -11.06 | <0.001       | -1.57 | 0.618        | 1.21  | 0.832 | 1.57  | 0.616 |
| sch_CAM-cam                                                | -4.50 | <0.001       | 2.78  | 0.061  | 5.06   | <0.001       | 1.98   | 0.355        | 1.98  | 0.354        | 1.32  | 0.772 | 0.74  | 0.977 |
| sch_CAM_sch                                                | -6.22 | <0.001       | 2.55  | 0.111  | 5.56   | <0.001       | 3.57   | <b>0.005</b> | 2.07  | 0.305        | 0.44  | 0.998 | 0.21  | 1     |
| CAM-cam_CAM_sch                                            | 1.72  | 0.518        | 0.23  | 1      | -0.49  | 0.996        | -1.59  | 0.607        | -0.09 | 1            | 0.88  | 0.952 | 0.53  | 0.995 |
| Copepods                                                   | 240   |              | 240   |        | 240    |              | 240    |              | 240   |              | 240   |       | 240   |       |

29

30



31 **Table S6: Outcome of multiple comparisons between treatments for each day.** Results from experiment II. Significant p-values are highlighted in bold.  
 32 Control: Uninfected control copepods, SCH: Copepods infected with *S. solidus* on day 0, cam: Copepods infected with *C. lacustris* on day 7, SCH-cam:  
 33 Copepods infected with one *S. solidus* on day 0 plus one *C. lacustris* on day 7.

| Activity after simulated predator attack |       |                  |       |                  |       |                  |        |                  |       |                  |       |              |       |       |
|------------------------------------------|-------|------------------|-------|------------------|-------|------------------|--------|------------------|-------|------------------|-------|--------------|-------|-------|
| Day                                      | 9     |                  | 11    |                  | 13    |                  | 15     |                  | 17    |                  | 19    |              | 21    |       |
|                                          | Z     | p                | Z     | p                | Z     | p                | Z      | p                | Z     | p                | Z     | p            | Z     | p     |
| Control_SCH                              | -1.17 | 0.646            | -1.79 | 0.280            | 0.69  | 0.900            | 0.67   | 0.908            | -0.53 | 0.952            | 1.10  | 0.692        | 0.19  | 0.998 |
| Control_cam                              | -4.12 | <b>&lt;0.001</b> | -7.07 | <b>&lt;0.001</b> | -8.44 | <b>&lt;0.001</b> | -8.21  | <b>&lt;0.001</b> | -0.65 | 0.914            | 2.66  | <b>0.039</b> | 1.42  | 0.489 |
| Control_SCH-cam                          | -5.68 | <b>&lt;0.001</b> | -6.93 | <b>&lt;0.001</b> | -5.09 | <b>&lt;0.001</b> | -4.00  | <b>&lt;0.001</b> | -1.70 | 0.323            | 1.13  | 0.672        | 0.84  | 0.833 |
| SCH_cam                                  | 2.70  | 0.035            | 4.85  | <b>&lt;0.001</b> | 8.56  | <b>&lt;0.001</b> | 8.29   | <b>&lt;0.001</b> | 0.07  | 1                | -1.37 | 0.515        | -1.13 | 0.670 |
| SCH_SCH-cam                              | -4.21 | <b>&lt;0.001</b> | -4.85 | <b>&lt;0.001</b> | -5.39 | <b>&lt;0.001</b> | -4.35  | <b>&lt;0.001</b> | -1.04 | 0.726            | -0.05 | 1            | 0.59  | 0.934 |
| cam_SCH-cam                              | -1.67 | 0.340            | -0.16 | 0.999            | 3.78  | <b>0.001</b>     | 4.57   | <b>&lt;0.001</b> | -1.05 | 0.718            | -1.53 | 0.417        | -0.58 | 0.937 |
| Observations                             | 4470  |                  | 4320  |                  | 4500  |                  | 4500   |                  | 4410  |                  | 4470  |              | 4410  |       |
| Copepods                                 | 149   |                  | 144   |                  | 150   |                  | 150    |                  | 147   |                  | 149   |              | 147   |       |
| Activity after a recovery period         |       |                  |       |                  |       |                  |        |                  |       |                  |       |              |       |       |
| Day                                      | 9     |                  | 11    |                  | 13    |                  | 15     |                  | 17    |                  | 19    |              | 21    |       |
|                                          | Z     | p                | Z     | p                | Z     | p                | Z      | p                | Z     | p                | Z     | p            | Z     | p     |
| Control_SCH                              | -3.96 | <b>&lt;0.001</b> | -4.01 | <b>&lt;0.001</b> | -4.74 | <b>&lt;0.001</b> | -4.61  | <b>&lt;0.001</b> | -3.41 | <b>0.004</b>     | -2.48 | 0.064        | -1.30 | 0.564 |
| Control_cam                              | -5.3  | <b>&lt;0.001</b> | -8.16 | <b>&lt;0.001</b> | -10.3 | <b>&lt;0.001</b> | -11.56 | <b>&lt;0.001</b> | -3.23 | <b>0.007</b>     | 0.29  | 0.992        | -0.39 | 0.980 |
| Control_SCH-cam                          | -7.66 | <b>&lt;0.001</b> | -8.35 | <b>&lt;0.001</b> | -9.97 | <b>&lt;0.001</b> | -11.04 | <b>&lt;0.001</b> | -5.19 | <b>&lt;0.001</b> | -1.77 | 0.288        | -1.46 | 0.459 |
| SCH_cam                                  | 1.00  | 0.749            | 3.79  | <b>0.001</b>     | 5.24  | <b>&lt;0.001</b> | 7.02   | <b>&lt;0.001</b> | -0.44 | 0.971            | -2.73 | <b>0.032</b> | -0.92 | 0.792 |
| SCH_SCH-cam                              | -3.34 | <b>0.004</b>     | -4.16 | <b>&lt;0.001</b> | -5.01 | <b>&lt;0.001</b> | -6.44  | <b>&lt;0.001</b> | -1.42 | 0.489            | 0.85  | 0.833        | -0.06 | 1     |
| cam_SCH-cam                              | -2.51 | 0.058            | -0.5  | 0.960            | 0.18  | 0.998            | 0.69   | 0.899            | -2.01 | 0.184            | -2.05 | 0.170        | -1.06 | 0.715 |
| Observations                             | 4470  |                  | 4320  |                  | 4500  |                  | 4500   |                  | 4410  |                  | 4470  |              | 4410  |       |
| Copepods                                 | 149   |                  | 144   |                  | 150   |                  | 150    |                  | 147   |                  | 149   |              | 147   |       |

34

| Latency to resume moving after a simulated predator attack |       |        |       |        |       |        |       |        |       |       |       |        |       |       |
|------------------------------------------------------------|-------|--------|-------|--------|-------|--------|-------|--------|-------|-------|-------|--------|-------|-------|
| Day                                                        | 9     |        | 11    |        | 13    |        | 15    |        | 17    |       | 19    |        | 21    |       |
|                                                            | Z     | p      | Z     | p      | Z     | p      | Z     | p      | Z     | p     | Z     | p      | Z     | p     |
| Control_SCH                                                | 0.66  | 0.910  | 1.15  | 0.656  | -0.53 | 0.952  | -1.04 | 0.726  | -0.17 | 0.998 | -2.16 | 0.136  | -0.11 | 0.999 |
| Control_cam                                                | 2.41  | 0.075  | 5.32  | <0.001 | 6.48  | <0.001 | 7.69  | <0.001 | -0.51 | 0.957 | -4.22 | <0.001 | -0.88 | 0.815 |
| Control_SCH-cam                                            | 5.31  | <0.001 | 6.62  | <0.001 | 3.41  | 0.004  | 3.34  | 0.005  | -0.79 | 0.860 | -1.89 | 0.231  | -0.57 | 0.942 |
| SCH_cam                                                    | -1.57 | 0.395  | -3.76 | 0.001  | -6.53 | <0.001 | -8.15 | <0.001 | 0.29  | 0.991 | 1.77  | 0.287  | 0.71  | 0.893 |
| SCH_SCH-cam                                                | 4.26  | <0.001 | 4.98  | <0.001 | 3.69  | 0.001  | 4.13  | <0.001 | -0.55 | 0.946 | 0.40  | 0.978  | -0.41 | 0.976 |
| cam_SCH-cam                                                | 2.87  | 0.021  | 1.37  | 0.516  | -3.07 | 0.012  | -4.34 | <0.001 | -0.29 | 0.992 | 2.35  | 0.088  | 0.32  | 0.988 |
| Copepods                                                   | 149   |        | 144   |        | 150   |        | 150   |        | 147   |       | 149   |        | 147   |       |

35
